# Supplementary material for: Early Prediction of Cardiac Arrest in the Intensive Care Unit Using Explainable Machine Learning: Retrospective Study
Source: J Med Internet Res. 2024 Sep 17;26:e62890. doi: 10.2196/62890 (PMC11445627; doi:10.2196/62890)
Supplement: Multimedia Appendix 5 [file jmir_v26i1e62890_app5.docx]

**Multimedia Appendix 5.** Statistical comparison of overall the area under the receiver operating characteristic curve between proposed method and baseline methods on the MIMIC-IV.

| **Classifier** | **95% CI**k | | ***P* value** |
| --- | --- | --- | --- |
| **Lower limit** | **Upper limit** |
| The Proposed Method with FSa vs. NEWSb | .11 | .28 | <.001 |
| The Proposed Method with FS vs. SOFAc | .09 | .26 | <.001 |
| The Proposed Method with FS vs. SAPS-IId | .16 | .33 | <.001 |
| The Proposed Method with FS vs. LRe | .07 | .24 | <.001 |
| The Proposed Method with FS vs. KNNf | .18 | .35 | <.001 |
| The Proposed Method with FS vs. MLPg | .14 | .32 | <.001 |
| The Proposed Method with FS vs. LGBMh | -.01 | .16 | .13 |
| The Proposed Method with FS vs. DEWSi | .18 | .35 | <.001 |
| The Proposed Method with FS vs. RETAINj | .08 | .26 | <.001 |
| The Proposed Method with FS  vs. The Proposed Method | -.05 | .12 | .90 |

aFS: feature screening

bNEWS: national early warning score

cSOFA: sequential organ failure assessment

dSAPS-II: simplified acute physiology score

eLR: logistic regression

fKNN: k-nearest neighbors

gMLP: multilayer perceptron

hLGBM: light gradient boosting method

iDEWS: deep learning-based early warning score

jRETAIN: reverse time attention

kCI: confidence interval
