# Supplementary material for: Early Prediction of Cardiac Arrest in the Intensive Care Unit Using Explainable Machine Learning: Retrospective Study
Source: J Med Internet Res. 2024 Sep 17;26:e62890. doi: 10.2196/62890 (PMC11445627; doi:10.2196/62890)
Supplement: Multimedia Appendix 12 [file jmir_v26i1e62890_app12.docx]

**Multimedia Appendix 12.** Statistical comparison of overall the area under the receiver operating characteristic curve between proposed method and baseline methods on the MIMIC-IV in cardiac ICU.

| **Classifier** | **95% CI**i | | ***P* value** |
| --- | --- | --- | --- |
| **Lower limit** | **Upper limit** |
| The Proposed Method vs. NEWSa | .01 | .28 | <.05 |
| The Proposed Method vs. SAPS-IIb | .04 | .31 | <.05 |
| The Proposed Method vs. LRc | -.09 | .18 | .90 |
| The Proposed Method vs. KNNd | .08 | .35 | <.001 |
| The Proposed Method vs. MLPe | .05 | .32 | <.001 |
| The Proposed Method vs. LGBMf | -.08 | .19 | .90 |
| The Proposed Method vs. DEWSg | .10 | .37 | <.001 |
| The Proposed Method vs. RETAINh | .03 | .30 | <.001 |

aNEWS: national early warning score

bSAPS-II: Simplified acute physiology score

cLR: logistic regression

dKNN: k-nearest neighbors

eMLP: multilayer perceptron

fLGBM: light gradient boosting method

gDEWS: deep learning-based early warning score

hRETAIN: reverse time attention

iCI: confidence interval
